# Supplementary material for: Crystal structure of a 1,6-bis(phenylethynyl)pyrene-based cyclophane that exhibits mechanochromic luminescence
Source: Royal Society of Chemistry journal article supplement (doi:10.1039/d1me00131k), 2021-01-01

## Supporting Information

### Crystal structure of a 1,6-bis(phenylethynyl)pyrene-based cyclophane that exhibits mechanochromic luminescence

Shohei Shimizu, Shakkeeb Thazhathethil, Kiyonori Takahashi,\* Takayoshi Nakamura,  
and Yoshimitsu Sagara\*

E-mail: ktakahashi@es.hokudai.ac.jp, sagara.y.aa@m.titech.ac.jp

#### Table of Contents

|                                                                                        |           |
|----------------------------------------------------------------------------------------|-----------|
| <b>General methods and materials</b>                                                   | <b>S2</b> |
| <b>Synthesis</b>                                                                       | <b>S3</b> |
| <b>Crystallographic data</b>                                                           | <b>S4</b> |
| <b>Atom numbering for the crystallographically independent molecule in the crystal</b> | <b>S5</b> |
| <b>A simulated XRD pattern of the LB-form</b>                                          | <b>S5</b> |
| <b>Reference</b>                                                                       | <b>S5</b> |
| <b>NMR data</b>                                                                        | <b>S6</b> |

## General methods and materials

All reagents and solvents were purchased from Aldrich, Tokyo Kasei, FUJIFILM Wako Pure Chemical Corporation, and Kanto Chemical. The reaction to obtain cyclophane **1** was carried out under nitrogen atmosphere. Flash silica gel column chromatography was performed with a Biotage Isolera Flash system using SHOKO-scientific Purif-Pack-EX cartridges. Recycling preparative gel permeation chromatography (GPC) was performed with a Japan Analytical Industry LaboACE. <sup>1</sup>H NMR spectrum was measured on a JEOL JNM-ECZ 400S/L1 spectrometer and all chemical shifts are reported on the  $\delta$ -scale in ppm relative to the signal of tetramethylsilane (TMS, at 0.00). Coupling constants ( $J$ ) are quoted in Hz and relative intensities are also shown. Proton-decoupled <sup>13</sup>C NMR spectrum was measured on a JEOL JNM-ECZ 400S/L1 spectrometer and all chemical shifts ( $\delta$ ) are quoted in ppm using the solvent as the internal standard (CDCl<sub>3</sub>, at 77.16). Elemental analysis was conducted with a J-SCIENCE JM10. Matrix-assisted laser desorption ionization time-of-flight (MALDI-TOF) mass spectrum was obtained on a SHIMADZU AXIMA PERFORMANCE. The DSC measurements were carried out using a Hitachi DSC7020 with a heating rate of 10 °C min<sup>-1</sup> under nitrogen atmosphere. Powder X-ray diffractions were measured with a Rigaku SmartLab. UV-vis absorption spectra were recorded on a JASCO V-550. Steady-state fluorescence spectra were recorded on a JASCO FP-6500. Time-resolved fluorescence measurements were carried out with a Hamamatsu Photonics Quantaaurus-Tau. Quantum efficiencies were measured with a Hamamatsu Photonics Quantaaurus-QY.

## Single crystal X-ray structure analysis.

A single crystal was mounted on a cryoloop with Paratone-N (Hampton Research). Crystallographic data was collected using a Rigaku XtaLab Synergy diffractometer with a single microfocus Mo K $\alpha$  X-ray radiation source (PhotonJet-S), equipped with a Hybrid Pixel (HyPix) Array detector (HyPix-6000HE) at -100 °C. Data collection, cell refinement, and data reduction were carried out with CrysAlisPRO (Rigaku Oxford Diffraction, 2017). The initial structure was solved by SHELXT<sup>S1</sup> and expanded using Fourier techniques and refined on  $F^2$  by the full-matrix least-squares method SHELXL2018/3<sup>S2</sup> package compiled into OLEX2 package.<sup>S3</sup> All parameters were refined using anisotropic temperature factors, except for hydrogen atoms, which were refined using the riding model, with a fixed C-H bond distance. The crystallographic data is summarized in Table S1. CCDC 2104824 (crystal of **1** in the LB-form) contains the supplementary crystallographic data for this paper.

## Synthesis

The synthetic route used to prepare compound **1** is shown in Scheme S1. 1,6-Bis(4-hydroxyphenylethynyl)pyrene and compound **4** were prepared according to the reported procedures.<sup>S4,S5</sup> Cyclophane **2** and acyclic reference compound **3** were also obtained through the reported procedures.<sup>S4</sup>

### Scheme S1

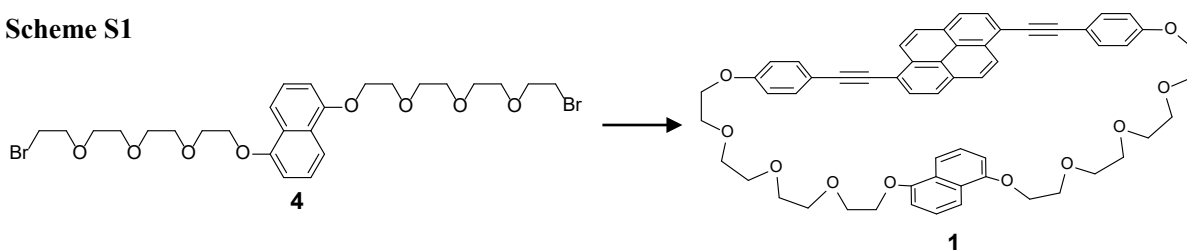

Conditions: 1,6-bis(4-hydroxyphenylethynyl)pyrene,  $K_2CO_3$ , DMF, 85 °C, 17 h.

**Compound 1.** A solution of compound **4** (582 mg, 0.912 mmol) and 1,6-bis(4-hydroxyphenylethynyl)pyrene (400 mg, 0.912 mmol) in DMF (50 mL) was added to a suspension of  $K_2CO_3$  (2.52 g, 18.2 mmol) in DMF (300 mL) dropwise at 85 °C over 5 h under vigorous stirring. After further stirring for 12 h at 85 °C, the reaction suspension was cooled and most of the DMF was evaporated in vacuo. The crude product was dissolved in chloroform (100 mL) and washed with saturated aq.  $NH_4Cl$  solution ( $5 \times 100$  mL), followed by saturated aq. NaCl solution (100 mL), the organic layer was dried over  $MgSO_4$ , filtered, and the solvent was evaporated. The crude product was purified by flash column chromatography on silica gel (eluent: dichloromethane/acetone = 92:8), recycling GPC (eluent: chloroform), and subsequently re-precipitated from a mixture of chloroform and hexane to afford compound **1** (91 mg,  $9.9 \times 10^{-2}$  mmol) as an orange powder in 9.7 % yield.

$^1H$  NMR (400 MHz,  $CDCl_3$ ):  $\delta$  = 3.41–3.44 (m, 4H), 3.46–3.49 (m, 4H), 3.55–3.58 (m, 4H), 3.62–3.65 (m, 4H), 3.78–3.81 (m, 4H), 3.85–3.89 (m, 8H), 4.41 (t,  $J$  = 4.0 Hz, 4H), 6.02 (d,  $J$  = 7.6 Hz, 2H), 6.46 (t,  $J$  = 8.0 Hz, 2H), 6.95 (d,  $J$  = 8.4 Hz, 2H), 7.14 (d,  $J$  = 8.8 Hz, 4H), 7.68 (d,  $J$  = 8.8 Hz, 4H), 7.77 (d,  $J$  = 8.4 Hz, 2H), 7.81 (d,  $J$  = 9.2 Hz, 2H), 7.99 (d,  $J$  = 8.0 Hz, 2H), 8.44 (d,  $J$  = 8.8 Hz, 2H).  $^{13}C$  NMR (100 MHz,  $CDCl_3$ ):  $\delta$  = 66.41, 67.89, 69.88, 70.40, 70.72, 70.98, 71.11, 88.01, 95.67, 104.23, 113.58, 115.91, 116.32, 118.29, 123.97, 124.93, 125.56, 125.69, 127.89, 129.23, 130.74, 131.71, 133.03, 153.33, 159.47. MS (MALDI-TOF):  $m/z$ : 910.24 (calcd.  $[M]^+$  = 910.37). Elemental analysis (%) calcd. for  $C_{58}H_{54}O_{10}$ : C 76.46, H 5.97, N 0.00; found: C 76.19, H 6.05, N 0.13.

## Crystallographic data

**Table S1.** Crystal data, data collection, and reduction parameter for **1** in the LB-form.

|                                           | <b>LB-form</b>                                  |
|-------------------------------------------|-------------------------------------------------|
| Temperature / K                           | 173                                             |
| Crystal Dimensions / mm <sup>3</sup>      | 0.71 × 0.408 × 0.239                            |
| Chemical formula                          | C <sub>58</sub> H <sub>54</sub> O <sub>10</sub> |
| Formula weight                            | 911.01                                          |
| Crystal System                            | Triclinic                                       |
| Space group                               | <i>P</i> -1                                     |
| <i>a</i> , Å                              | 12.3727(4)                                      |
| <i>b</i> , Å                              | 14.5043(5)                                      |
| <i>c</i> , Å                              | 14.6034(5)                                      |
| $\alpha$ , deg                            | 69.637(3)                                       |
| $\beta$ , deg                             | 89.791(3)                                       |
| $\gamma$ , deg                            | 70.552(3)                                       |
| <i>V</i> , Å <sup>3</sup>                 | 2297.99(15)                                     |
| <i>Z</i>                                  | 2                                               |
| D <sub>calc</sub> , g·cm <sup>-3</sup>    | 1.317                                           |
| $\mu$ , (Cu K $\alpha$ ) cm <sup>-1</sup> | 0.089                                           |
| $2\theta_{max}$ , deg                     | 62.043                                          |
| Reflections measured                      | 34248                                           |
| Independent reflections                   | 11594                                           |
| Reflections used                          | 11594                                           |
| $R_1$ <sup>a</sup>                        | 0.0642                                          |
| $R_w(F^2)$ <sup>b</sup>                   | 0.1878                                          |
| <i>GOF</i>                                | 1.060                                           |
| <i>CCDC number</i>                        | 2104824                                         |

<sup>a</sup>  $R_1 = \Sigma||F_o| - |F_c|| / \Sigma|F_o|$

<sup>b</sup>  $R_w = (\Sigma\omega(|F_o| - |F_c|)^2 / \Sigma\omega F_o^2)^{1/2}$

## Atom numbering for the crystallographically independent molecule in the crystal

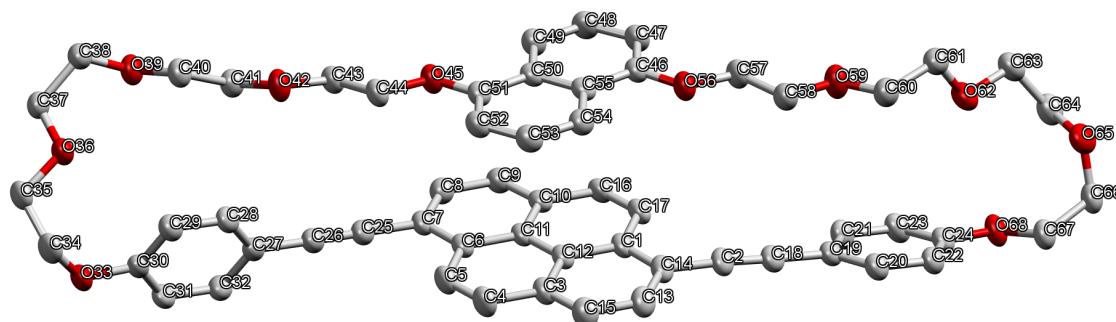

**Figure S1.** Crystallographically independent molecular structure of **1** in the LB-form with atom numbering.

## A simulated XRD pattern of the LB-form

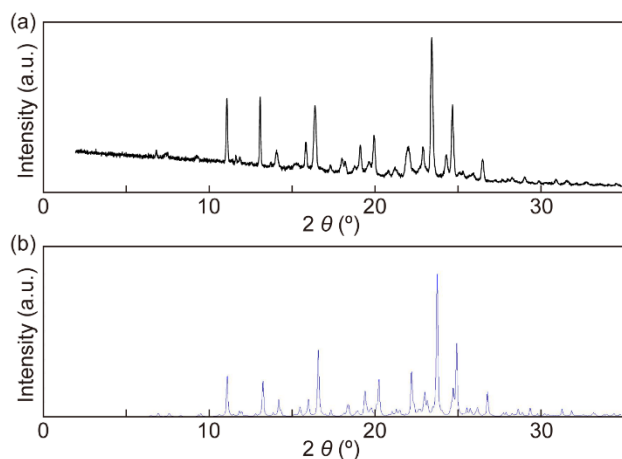

**Figure S2.** (a) The XRD diffractogram of cyclophane **1** in the LB-form. (b) The simulated XRD pattern based on the crystal structure of **1** in the LB-form.

## References

- S1. G. M. Sheldrick, *Acta. Cryst.*, 2015, **A71**, 3–8.
- S2. G. M. Sheldrick, *Acta. Cryst.*, 2015, **C71**, 3–8.
- S3. O. V. Dolomanov, L. J. Bourhis, R. J. Gildea, J. A. K. Howard, H. Puschmann, *J. Appl. Cryst.*, 2009, **42**, 339–341.
- S4. Y. Sagara, C. Weder, N. Tamaoki, *Chem. Mater.*, 2017, **29**, 6145–6152.
- S5. Y. Sagara, M. Karman, E. Verde-Sesto, K. Matsuo, Y. Kim, N. Tamaoki, C. Weder, *J. Am. Chem. Soc.*, 2018, **140**, 1584–1587.

# NMR data

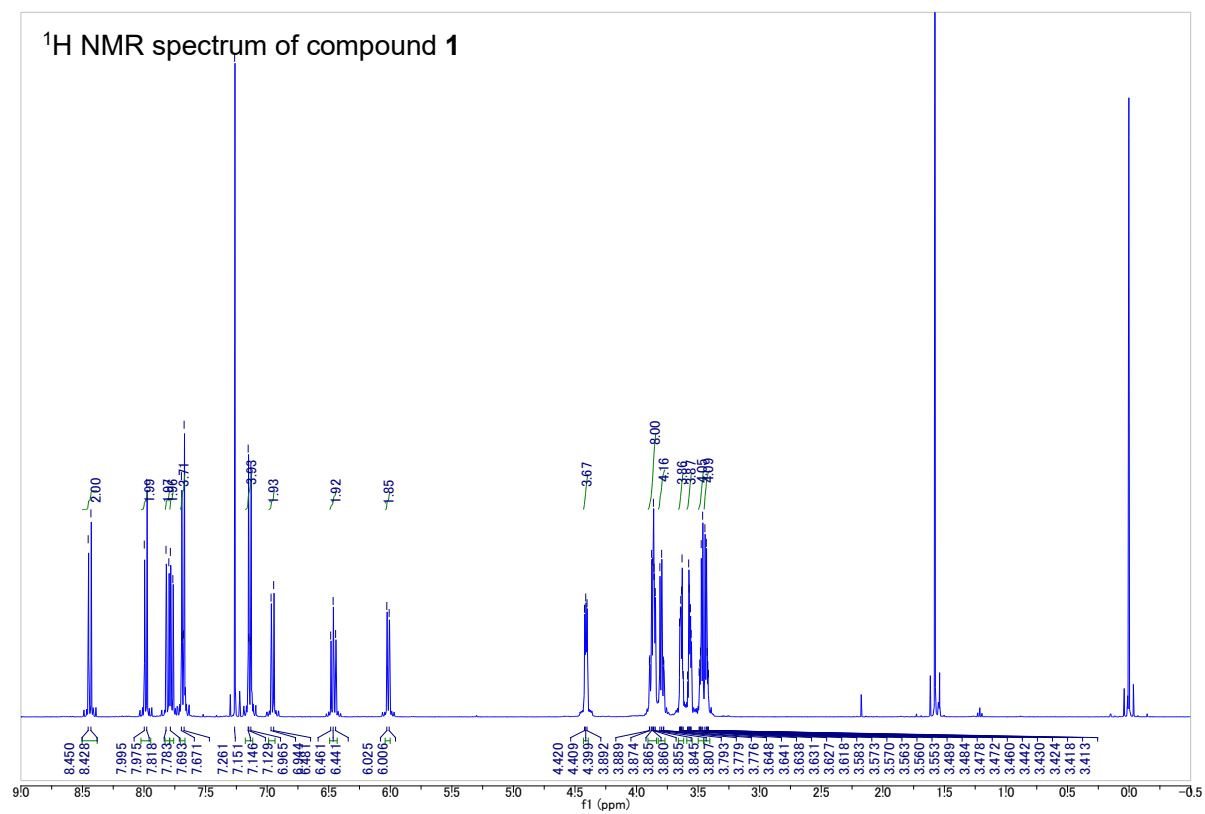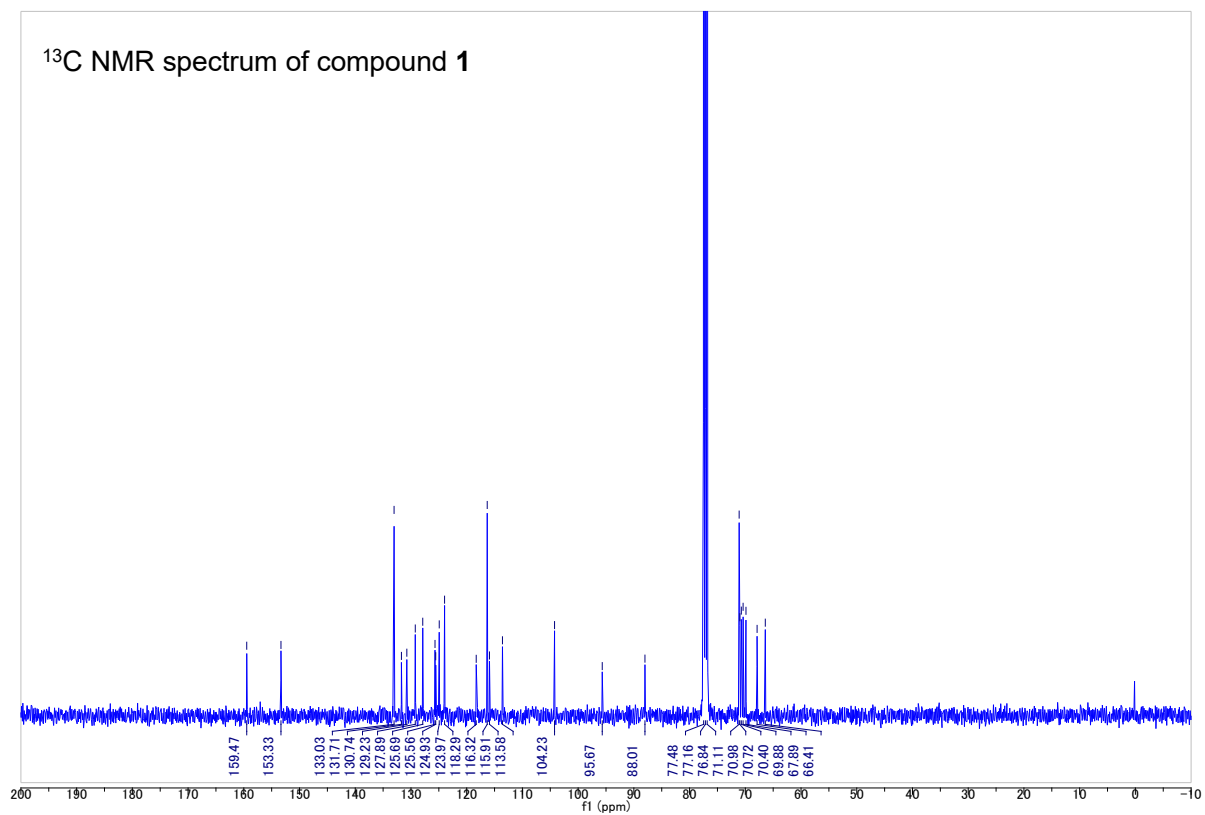

Supplement: d1me00131k1.pdf [file d1me00131k1.pdf]
